# Supplementary material for: Thermogravimetric analysis of commercial tungsten molecular precursors for vapor phase deposition processes
Source: Royal Society of Chemistry journal article supplement (doi:10.1039/d4ra07284g), 2024-01-01
Supplement: d4ra07284g1.pdf [file d4ra07284g1.pdf]

## Thermogravimetric analysis of commercial tungsten molecular precursors for vapor phase deposition processes

Taylor M. Currie,<sup>a,b</sup> Terrick McNealy-James,<sup>b,c</sup> S. Novia Berriel,<sup>b,c</sup> Konstantin Preradovic,<sup>a</sup> Alfred P. Sattelberger,<sup>a</sup> Parag Banerjee,<sup>b,c,d,e</sup> and Titel Jurca,\*<sup>a,b,d</sup>

<sup>a</sup> Department of Chemistry, University of Central Florida, Orlando, Florida 32816, USA

<sup>b</sup> Renewable Energy and Chemical Transformations Cluster, University of Central Florida, Orlando, Florida 32816, USA

<sup>c</sup> Department of Materials Science and Engineering, University of Central Florida, Orlando, Florida 32816, USA

<sup>d</sup> NanoScience & Technology Center, University of Central Florida, Orlando, Florida 32826, USA

<sup>e</sup> Florida Solar Energy Center, University of Central Florida, Cocoa, Florida 32922, USA

### Table of contents

|    |                                                          |         |
|----|----------------------------------------------------------|---------|
| 1. | Thermogravimetric analysis of $W(CO)_6$ .....            | S2-S4   |
| 2. | Thermogravimetric analysis of BTBMW.....                 | S5-S7   |
| 3. | Thermogravimetric analysis of (1,5-cod) $W(CO)_4$ .....  | S8-S10  |
| 4. | Thermogravimetric analysis of $WH_2(iPrCp)_2$ .....      | S11-S13 |
| 5. | Thermogravimetric analysis of $WH_2(Cp)_2$ .....         | S14-S16 |
| 6. | Thermogravimetric analysis of $[WCl_5]_2$ .....          | S17-S19 |
| 7. | Thermogravimetric analysis of $WCl_6$ .....              | S20-S22 |
| 8. | Thermogravimetric analysis of (mes) $W(CO)_3$ .....      | S23     |
| 9. | Comparison of TGA-derived values for all precursors..... | S24     |

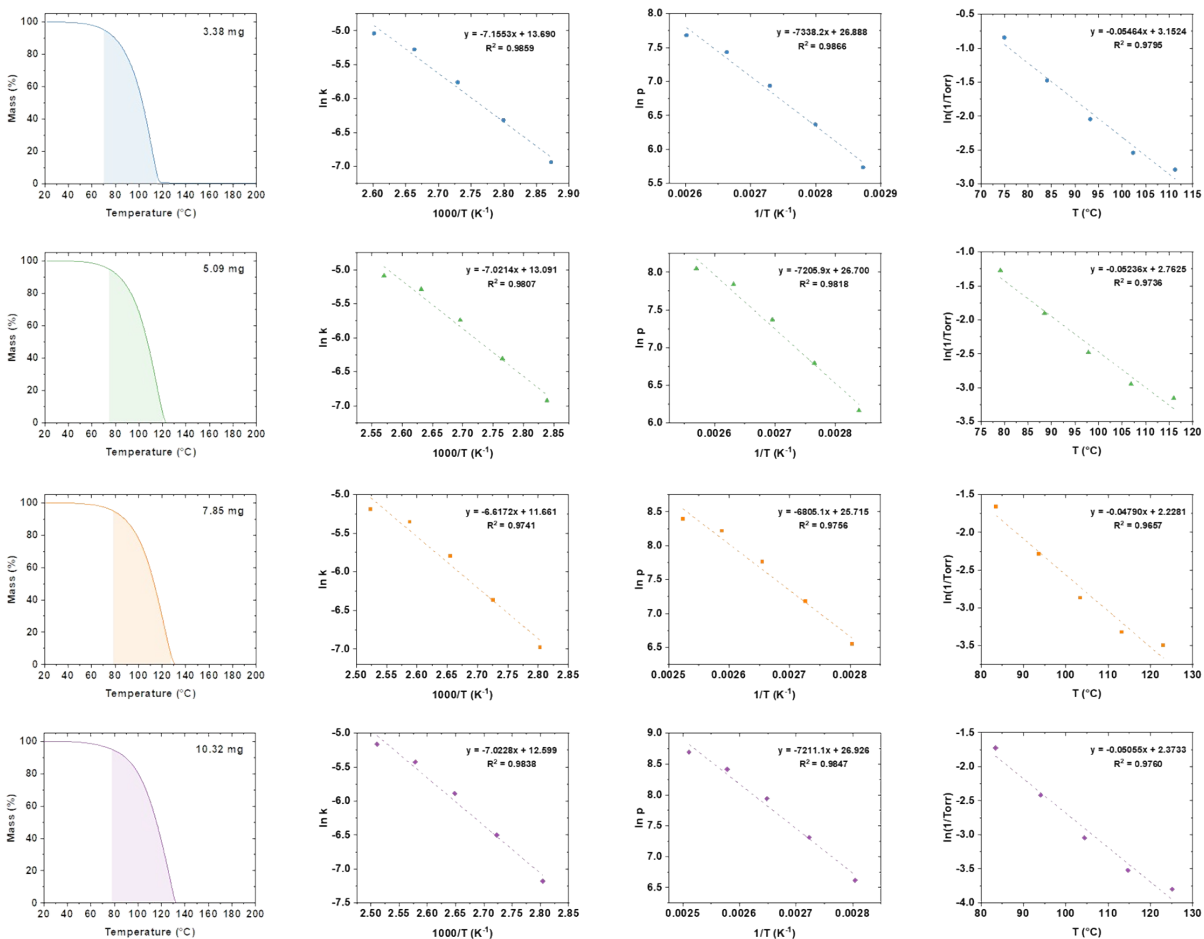

**Figure S1.** Thermogravimetric analysis of  $W(CO)_6$ . TG traces at constant temperature ramp rate of  $10\text{ }^\circ\text{C}/\text{min}$  and nominally 3 (blue), 5 (green), 8 (orange), and 10 (purple) mg (with actual masses displayed on graphs). Shaded regions underneath TG traces represent TGA temperature windows. Plots of  $\ln k$  vs  $1000/T$ ,  $\ln p$  vs  $1/T$ , and  $\ln(1/\text{Torr})$  vs  $T$  used to derive  $E_a$ ,  $\Delta H_{\text{sub}}$ , and  $T$  at 1 Torr, respectively. Equation of line of best fit and  $R^2$  value displayed on each of these plots.

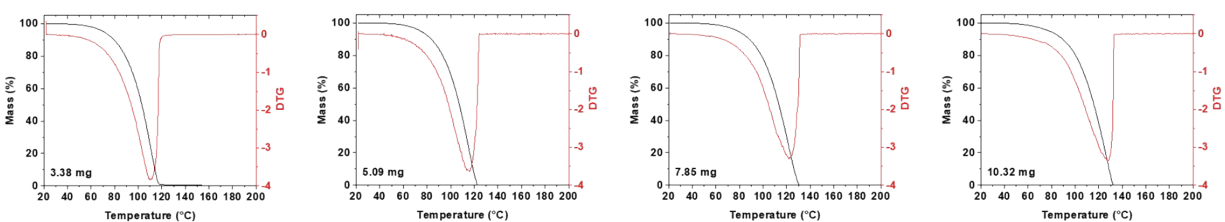

**Figure S2.** Thermogravimetric analysis of  $W(CO)_6$ . TG traces at constant temperature ramp rate of  $10\text{ }^\circ\text{C}/\text{min}$  and variable masses with derivative thermogravimetric (DTG) traces shown.

**Table S1.** Measured and calculated thermophysical parameters from TGA of  $W(CO)_6$  at constant temperature ramp rate of  $10\text{ }^\circ\text{C}/\text{min}$  and variable masses.

| Sample mass (mg)                   | 3.38   | 5.09   | 7.85   | 10.32  |
|------------------------------------|--------|--------|--------|--------|
| Slope (Arrhenius plot)             | -7.16  | -7.02  | -6.62  | -7.02  |
| $R^2$ (Arrhenius plot)             | 0.99   | 0.98   | 0.97   | 0.98   |
| $E_a$ (J/mol)                      | 59.49  | 58.38  | 55.02  | 58.39  |
| $R^2$ (Clausius-Clapeyron plot)    | 0.99   | 0.98   | 0.98   | 0.98   |
| $\Delta H_{\text{sub}}$ (kJ/mol)   | 61.01  | 59.91  | 56.58  | 59.96  |
| $T$ at 1 Torr ( $^\circ\text{C}$ ) | 57.69  | 52.76  | 46.52  | 46.95  |
| $T$ window ( $^\circ\text{C}$ )    | 71-116 | 75-120 | 79-128 | 78-130 |
| Residual mass (%)                  | 0.00   | 0.00   | 0.00   | 0.00   |

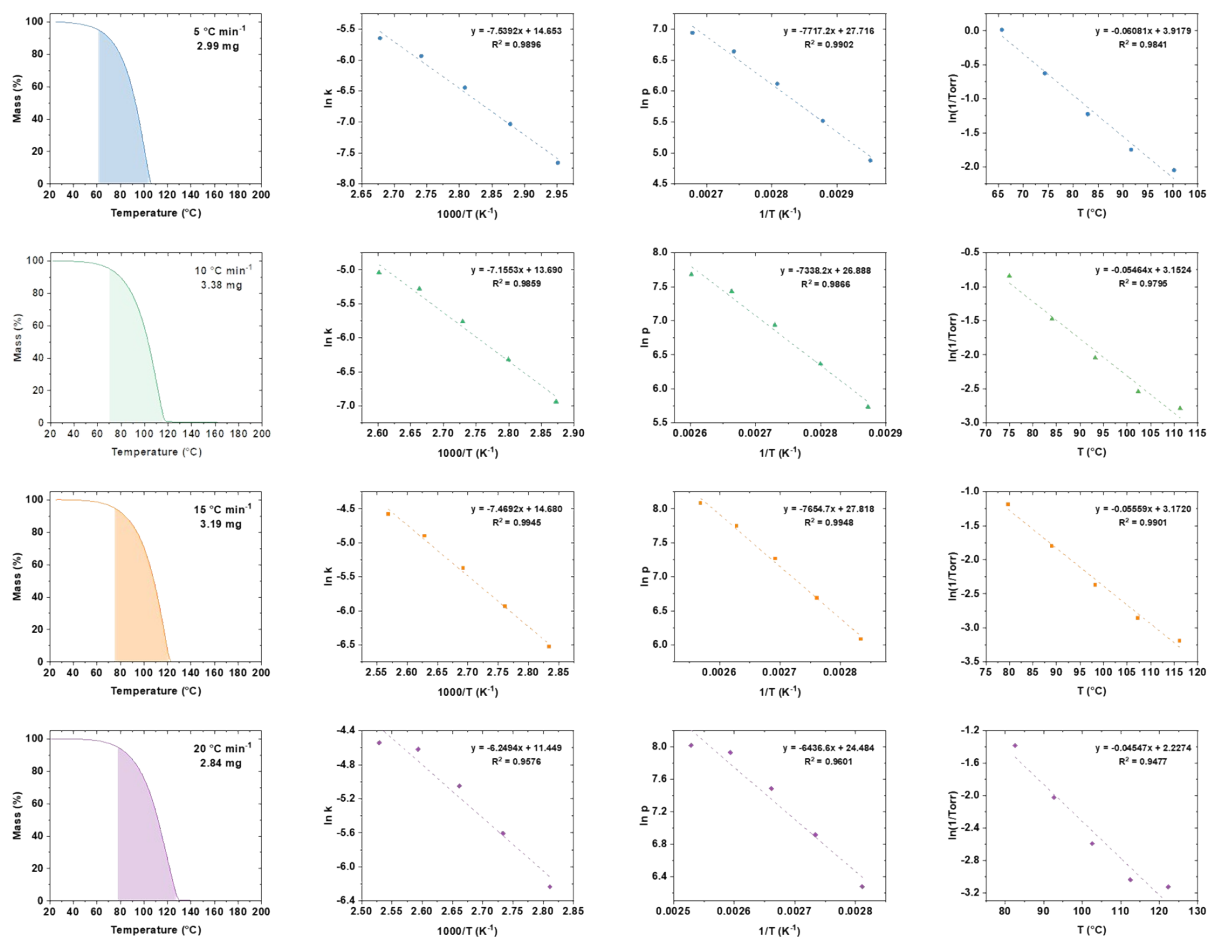

**Figure S3.** Thermogravimetric analysis of  $W(CO)_6$ . TG traces at nominally 3 mg and variable temperature ramp rates of 5 (blue), 10 (green), 15 (orange), and 20 (purple)  $^\circ\text{C}/\text{min}$  (with actual masses displayed on graphs). Shaded regions underneath TG traces represent TGA temperature windows. Plots of  $\ln k$  vs  $1000/T$ ,  $\ln p$  vs  $1/T$ , and  $\ln(p/\text{Torr})$  vs  $T$  used to derive  $E_a$ ,  $\Delta H_{\text{sub}}$ , and  $T$  at 1 Torr, respectively. Equation of line of best fit and  $R^2$  value displayed on each of these plots.

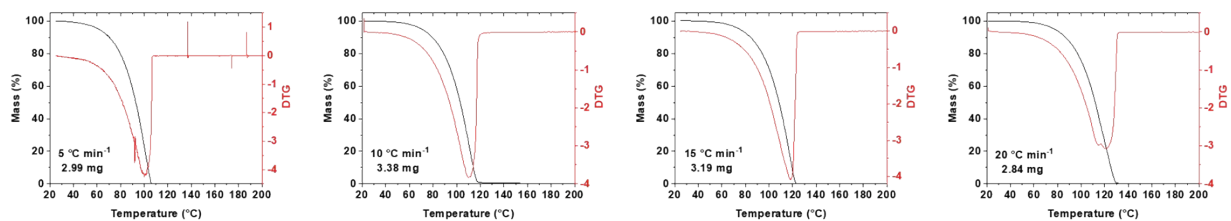

**Figure S4.** Thermogravimetric analysis of  $W(CO)_6$ . TG traces at nominally 3 mg and variable temperature ramp rates with derivative thermogravimetric (DTG) traces shown.

**Table S2.** Measured and calculated thermophysical parameters from TGA of  $W(CO)_6$  at nominally 3 mg and variable temperature ramp rates.

| Heating rate (°C/min)           | 5      | 10     | 15     | 20     |
|---------------------------------|--------|--------|--------|--------|
| Sample mass (mg)                | 2.99   | 3.38   | 3.19   | 2.84   |
| Slope (Arrhenius plot)          | -7.54  | -7.16  | -7.47  | -6.25  |
| $R^2$ (Arrhenius plot)          | 0.99   | 0.99   | 0.99   | 0.96   |
| $E_a$ (J/mol)                   | 62.68  | 59.49  | 62.10  | 51.96  |
| $R^2$ (Clausius-Clapeyron plot) | 0.99   | 0.99   | 0.99   | 0.96   |
| $\Delta H_{sub}$ (kJ/mol)       | 64.16  | 61.01  | 63.65  | 53.52  |
| $T$ at 1 Torr (°C)              | 64.43  | 57.69  | 57.06  | 48.99  |
| $T$ window (°C)                 | 64-104 | 71-116 | 75-121 | 78-127 |
| Residual mass (%)               | 0.00   | 0.00   | 0.00   | 0.08   |

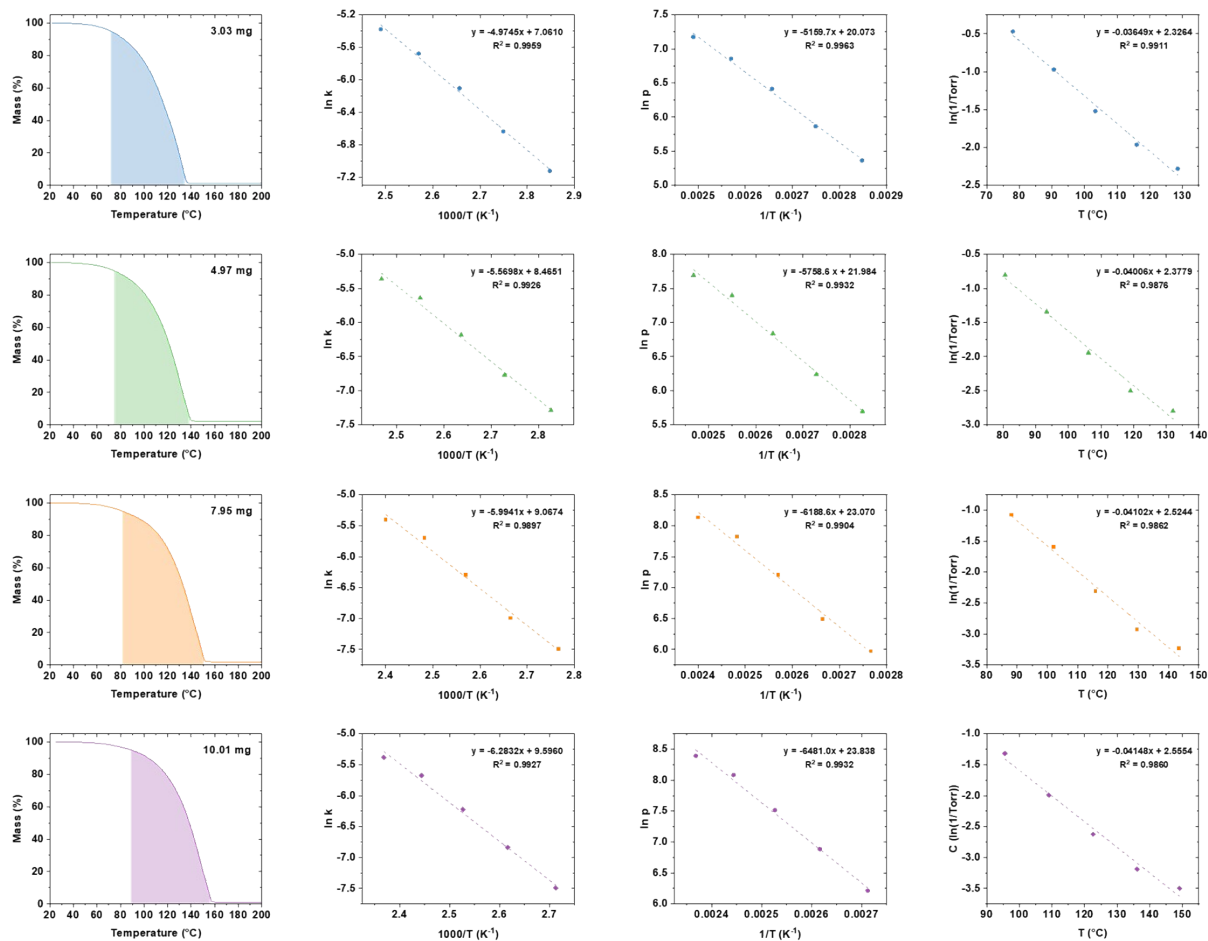

**Figure S5.** Thermogravimetric analysis of BTBMW. TG traces at constant temperature ramp rate of 10 °C/min and nominally 3 (blue), 5 (green), 8 (orange), and 10 (purple) mg (with actual masses displayed on graphs). Shaded regions underneath TG traces represent TGA temperature windows. Plots of  $\ln k$  vs  $1000/T$ ,  $\ln p$  vs  $1/T$ , and  $\ln(1/\text{Torr})$  vs  $T$  used to derive  $E_a$ ,  $\Delta H_{\text{sub}}$ , and  $T$  at 1 Torr, respectively. Equation of line of best fit and  $R^2$  value displayed on each of these plots.

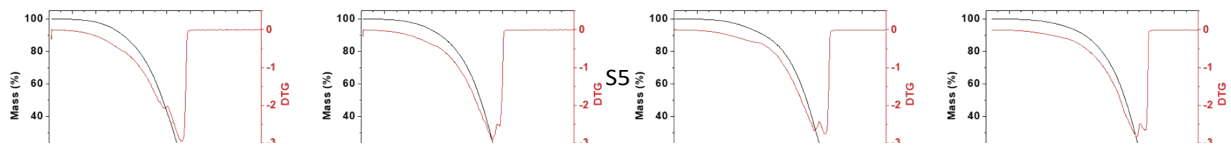

**Figure S6.** Thermogravimetric analysis of BTBMW. TG traces at constant temperature ramp rate of 10 °C/min and variable masses with derivative thermogravimetric (DTG) traces shown.

**Table S3.** Measured and calculated thermophysical parameters from TGA of BTBMW at constant temperature ramp rate of 10 °C/min and variable masses.

| Sample mass (mg)                         | 3.03   | 4.97   | 7.95   | 10.01  |
|------------------------------------------|--------|--------|--------|--------|
| Slope (Arrhenius plot)                   | -4.97  | -5.57  | -5.99  | -6.28  |
| R <sup>2</sup> (Arrhenius plot)          | 1.00   | 0.99   | 0.99   | 0.99   |
| E <sub>a</sub> (J/mol)                   | 41.36  | 46.31  | 49.83  | 52.24  |
| R <sup>2</sup> (Clausius-Clapeyron plot) | 1.00   | 0.99   | 0.99   | 0.99   |
| ΔH <sub>sub</sub> (kJ/mol)               | 42.90  | 47.88  | 51.46  | 53.89  |
| T at 1 Torr (°C)                         | 63.75  | 59.36  | 61.54  | 61.61  |
| T window (°C)                            | 72-135 | 74-139 | 81-150 | 89-156 |
| Residual mass (%)                        | 1.23   | 2.09   | 1.64   | 0.92   |

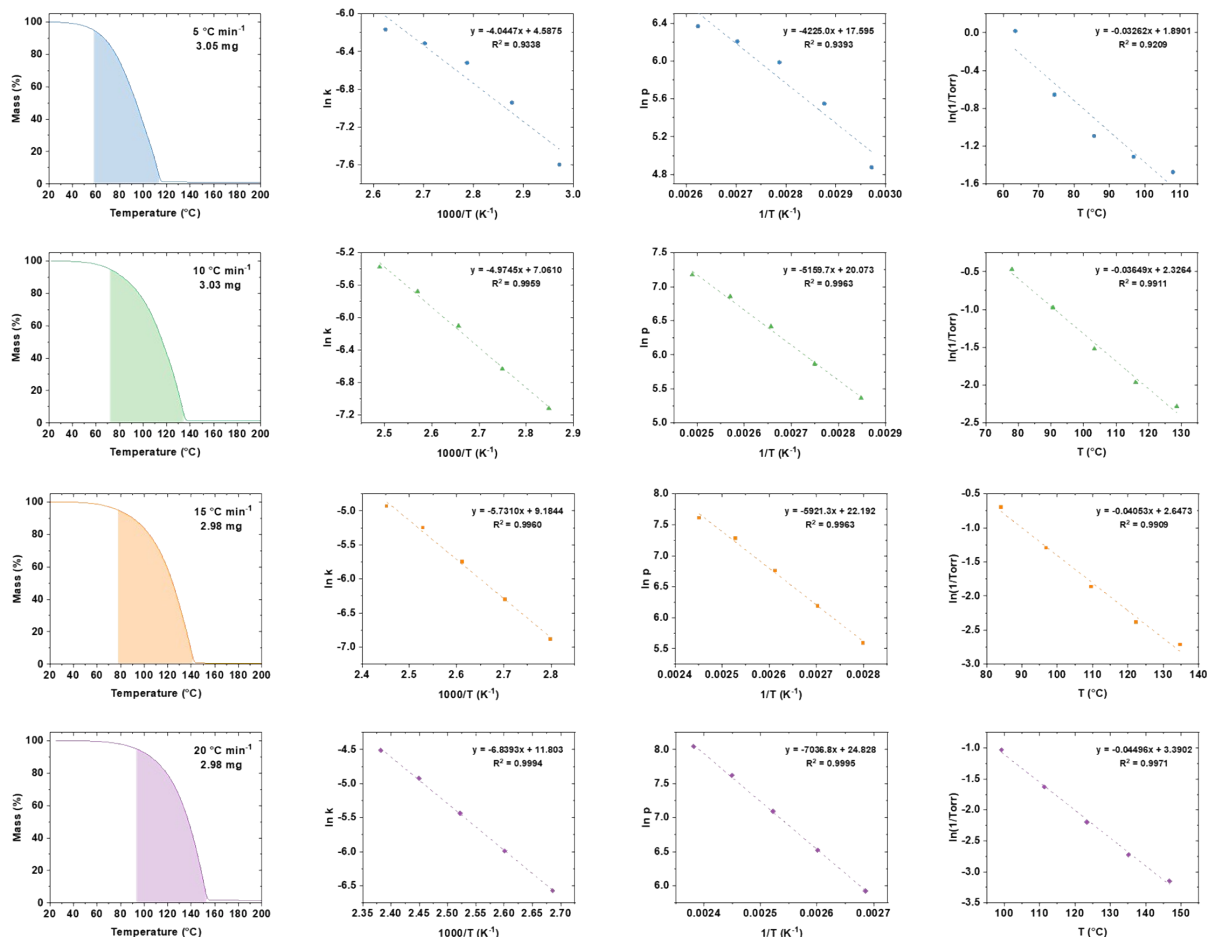

**Figure S7.** Thermogravimetric analysis of BTBMW. TG traces at nominally 3 mg and variable temperature ramp rates of 5 (blue), 10 (green), 15 (orange), and 20 (purple) °C/min (with actual masses displayed on graphs). Shaded regions underneath TG traces represent TGA temperature windows. Plots of ln k vs 1000/T, ln p vs 1/T, and ln(1/Torr) vs T used to derive E<sub>a</sub>, ΔH<sub>sub</sub>, and T at 1 Torr, respectively. Equation of line of best fit and R<sup>2</sup> value displayed on each of these plots.

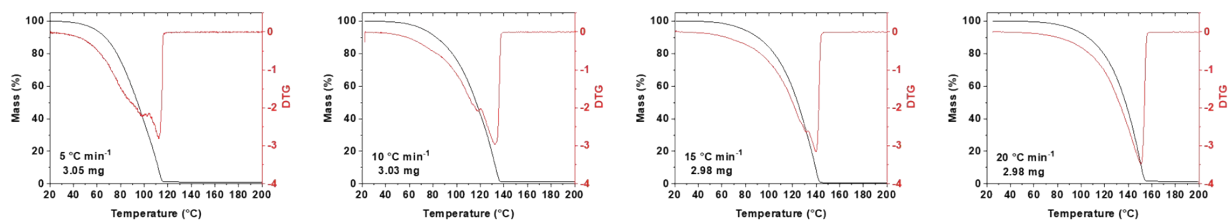

**Figure S8.** Thermogravimetric analysis of BTBMW. TG traces at nominally 3 mg and variable temperature ramp rates with derivative thermogravimetric (DTG) traces shown.

**Table S4.** Measured and calculated thermophysical parameters from TGA of BTBMW at nominally 3 mg and variable temperature ramp rates.

| Heating rate (°C /min)                   | 5      | 10     | 15     | 20     |
|------------------------------------------|--------|--------|--------|--------|
| Sample mass (mg)                         | 3.05   | 3.03   | 2.98   | 2.98   |
| Slope (Arrhenius plot)                   | -4.04  | -4.97  | -5.73  | -6.84  |
| R <sup>2</sup> (Arrhenius plot)          | 0.93   | 1.00   | 1.00   | 1.00   |
| E <sub>a</sub> (J/mol)                   | 33.63  | 41.36  | 47.65  | 56.86  |
| R <sup>2</sup> (Clausius-Clapeyron plot) | 0.94   | 1.00   | 1.00   | 1.00   |
| ΔH <sub>sub</sub> (kJ/mol)               | 35.13  | 42.90  | 49.23  | 58.51  |
| T at 1 Torr (°C)                         | 57.94  | 63.75  | 65.32  | 74.27  |
| T window (°C)                            | 58-114 | 72-135 | 78-141 | 93-153 |
| Residual mass (%)                        | 0.86   | 1.23   | 0.58   | 1.49   |

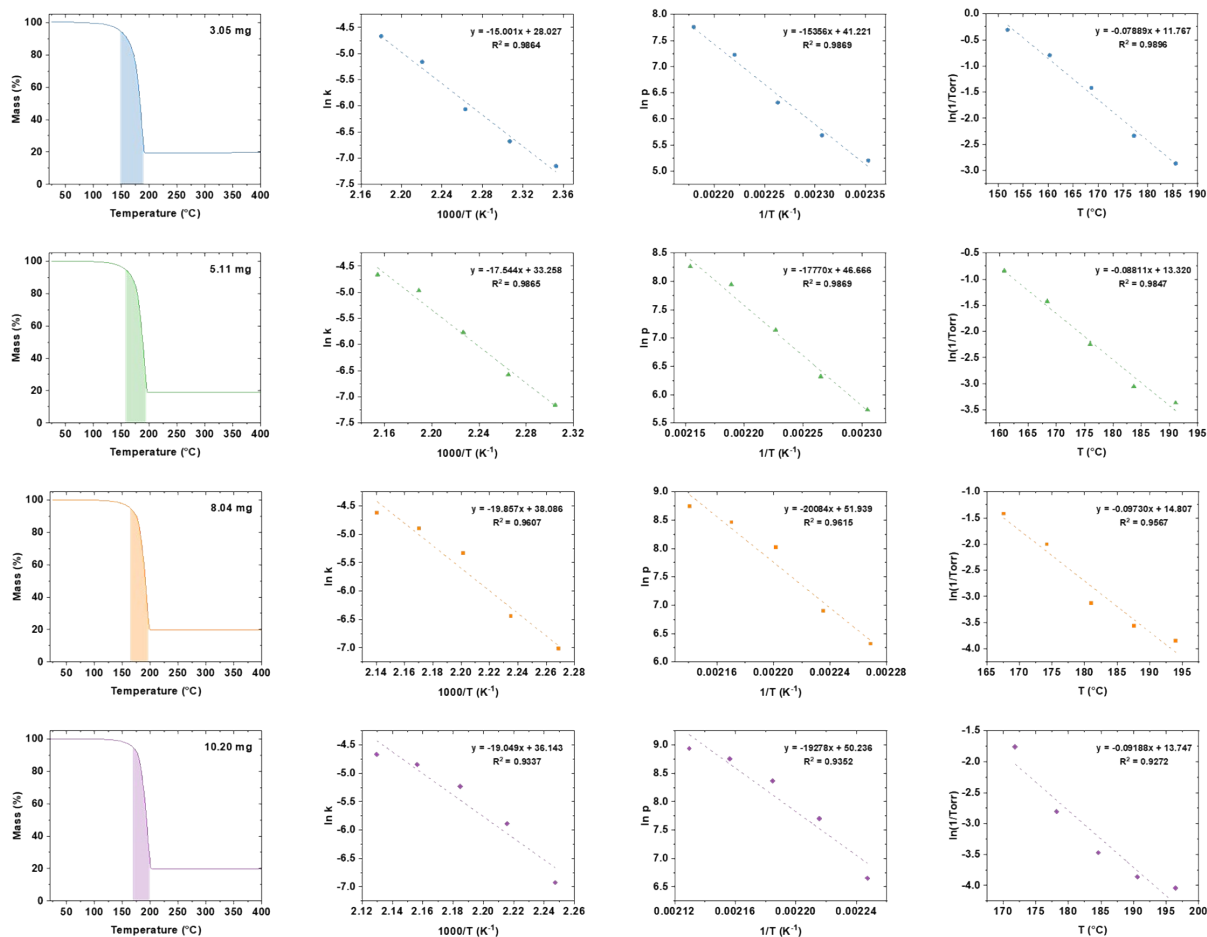

**Figure S9.** Thermogravimetric analysis of  $(1,5\text{-cod})\text{W}(\text{CO})_4$ . TG traces at constant temperature ramp rate of  $10\text{ }^\circ\text{C}/\text{min}$  and nominally 3 (blue), 5 (green), 8 (orange), and 10 (purple) mg (with actual masses displayed on graphs). Shaded regions underneath TG traces represent TGA temperature windows. Plots of  $\ln k$  vs  $1000/T$ ,  $\ln p$  vs  $1/T$ , and  $\ln(1/\text{Torr})$  vs  $T$  used to derive  $E_a$ ,  $\Delta H_{\text{sub}}$ , and  $T$  at 1 Torr, respectively. Equation of line of best fit and  $R^2$  value displayed on each of these plots.

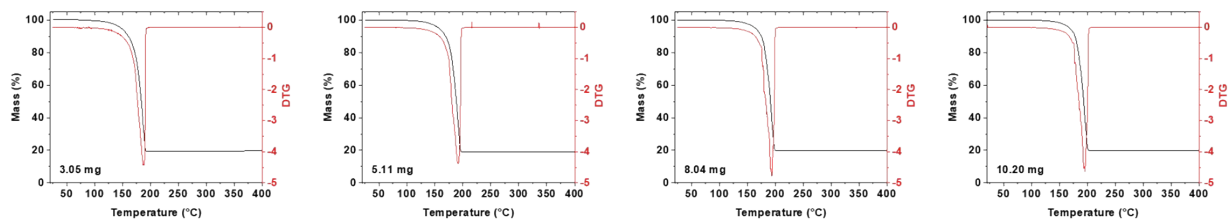

**Figure S10.** Thermogravimetric analysis of  $(1,5\text{-cod})\text{W}(\text{CO})_4$ . TG traces at constant temperature ramp rate of  $10\text{ }^\circ\text{C}/\text{min}$  and variable masses with derivative thermogravimetric (DTG) traces shown.



**Table S5.** Measured and calculated thermophysical parameters from TGA of (1,5-cod)W(CO)<sub>4</sub> at constant temperature ramp rate of 10 °C/min and variable masses.

| Sample mass (mg)                         | 3.05    | 5.11    | 8.04    | 10.20   |
|------------------------------------------|---------|---------|---------|---------|
| Slope (Arrhenius plot)                   | -15.00  | -17.54  | -19.86  | -19.05  |
| R <sup>2</sup> (Arrhenius plot)          | 0.99    | 0.99    | 0.96    | 0.93    |
| E <sub>a</sub> (J/mol)                   | 124.72  | 145.86  | 165.09  | 158.37  |
| R <sup>2</sup> (Clausius-Clapeyron plot) | 0.99    | 0.99    | 0.96    | 0.94    |
| ΔH <sub>sub</sub> (kJ/mol)               | 127.68  | 147.75  | 166.99  | 160.29  |
| T at 1 Torr (°C)                         | 149.16  | 151.17  | 152.18  | 149.62  |
| T window (°C)                            | 148-190 | 157-195 | 164-197 | 169-199 |
| Residual mass (%)                        | 19.67   | 18.97   | 19.65   | 19.75   |

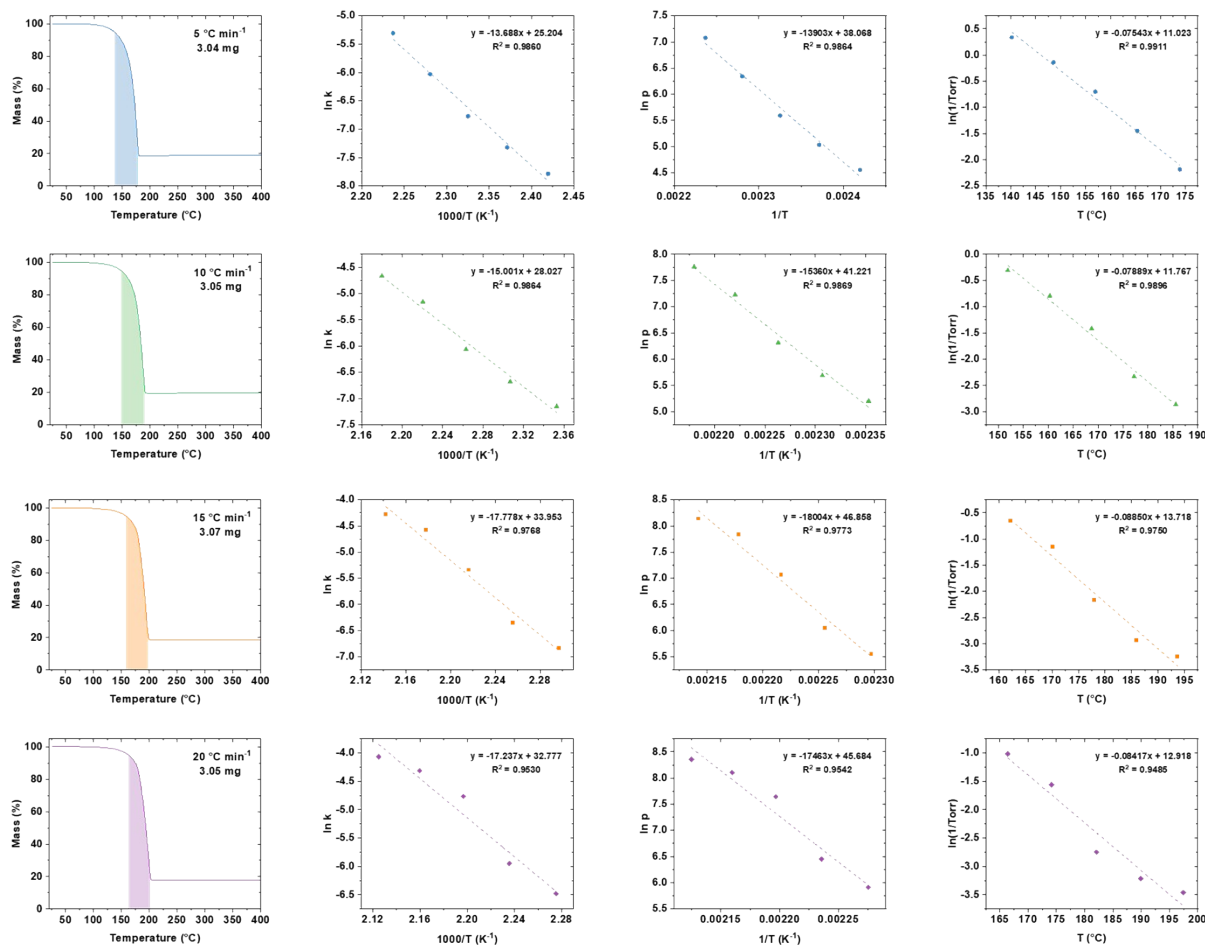

**Figure S11.** Thermogravimetric analysis of (1,5-cod)W(CO)<sub>4</sub>. TG traces at nominally 3 mg and variable temperature ramp rates of 5 (blue), 10 (green), 15 (orange), and 20 (purple) °C/min (with actual masses displayed on graphs). Shaded regions underneath TG traces represent TGA temperature windows. Plots of  $\ln k$  vs  $1000/T$ ,  $\ln p$  vs  $1/T$ , and  $\ln(1/\text{Torr})$  vs  $T$  used to derive  $E_a$ ,  $\Delta H_{\text{sub}}$ , and  $T$  at 1 Torr, respectively. Equation of line of best fit and  $R^2$  value displayed on each of these plots.

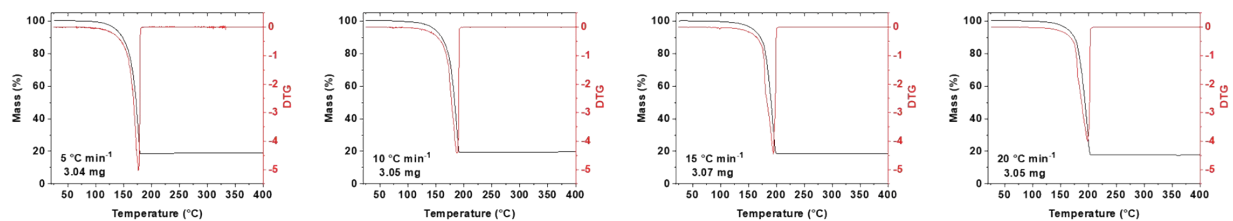

**Figure S12.** Thermogravimetric analysis of (1,5-cod)W(CO)<sub>4</sub>. TG TG traces at nominally 3 mg and variable temperature ramp rates with derivative thermogravimetric (DTG) traces shown.

**Table S6.** Measured and calculated thermophysical parameters from TGA of (1,5-cod)W(CO)<sub>4</sub> at nominally 3 mg and variable temperature ramp rates.

| Heating rate (°C/min)                    | 5       | 10      | 15      | 20      |
|------------------------------------------|---------|---------|---------|---------|
| Sample mass (mg)                         | 3.04    | 3.05    | 3.07    | 3.05    |
| Slope (Arrhenius plot)                   | -13.69  | -15.00  | -17.78  | -17.24  |
| R <sup>2</sup> (Arrhenius plot)          | 0.99    | 0.99    | 0.98    | 0.95    |
| E <sub>a</sub> (J/mol)                   | 113.80  | 124.72  | 147.81  | 143.31  |
| R <sup>2</sup> (Clausius-Clapeyron plot) | 0.99    | 0.99    | 0.98    | 0.95    |
| ΔH <sub>sub</sub> (kJ/mol)               | 115.60  | 127.71  | 149.69  | 145.20  |
| T at 1 Torr (°C)                         | 146.14  | 149.16  | 155.01  | 153.48  |
| T window (°C)                            | 136-178 | 148-190 | 158-197 | 163-201 |
| Residual mass (%)                        | 19.10   | 19.67   | 18.68   | 17.65   |

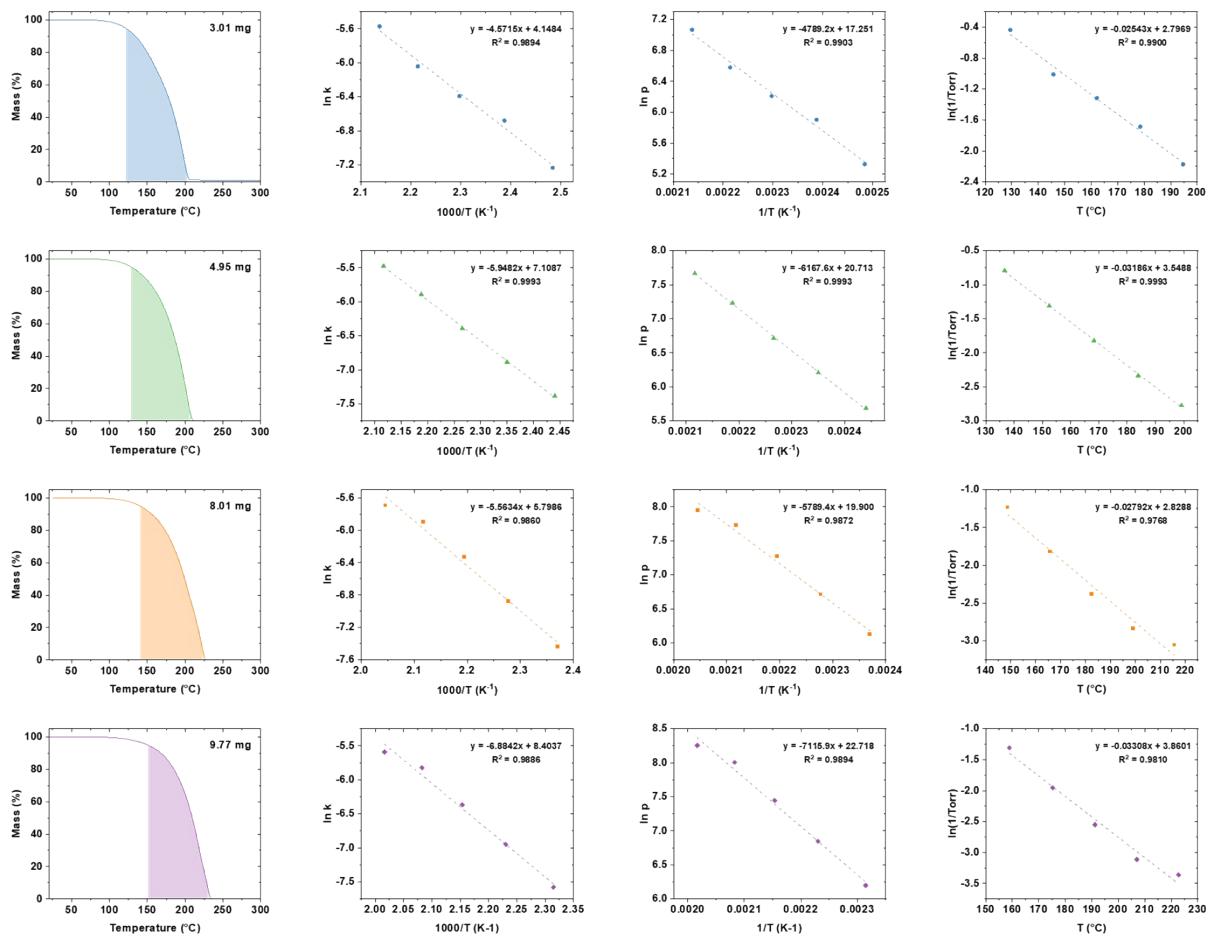

**Figure S13.** Thermogravimetric analysis of  $\text{WH}_2(\text{iPrCp})_2$ . TG traces at constant temperature ramp rate of  $10^\circ\text{C}/\text{min}$  and nominally 3 (blue), 5 (green), 8 (orange), and 10 (purple) mg (with actual masses displayed on graphs). Shaded regions underneath TG traces represent TGA temperature windows. Plots of  $\ln k$  vs  $1000/T$ ,  $\ln p$  vs  $1/T$ , and  $\ln(1/\text{Torr})$  vs  $T$  used to derive  $E_a$ ,  $\Delta H_{\text{sub}}$ , and  $T$  at 1 Torr, respectively. Equation of line of best fit and  $R^2$  value displayed on each of these plots.

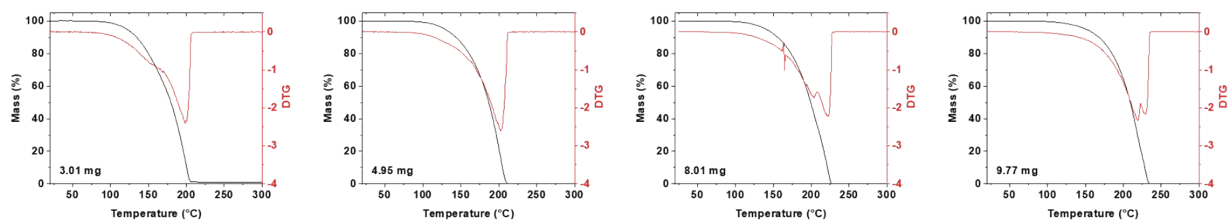

**Figure S14.** Thermogravimetric analysis of  $\text{WH}_2(\text{iPrCp})_2$ . Thermogravimetric analysis of  $\text{W}(\text{CO})_6$ . TG traces at constant temperature ramp rate of  $10^\circ\text{C}/\text{min}$  and variable masses with derivative thermogravimetric (DTG) traces shown.

**Table S7.** Measured and calculated thermophysical parameters from TGA of  $\text{WH}_2(\text{iPrCp})_2$  at constant temperature ramp rate of  $10\text{ }^\circ\text{C}/\text{min}$  and variable masses.

| Sample mass (mg)                   | 3.01    | 4.95    | 8.01    | 9.77    |
|------------------------------------|---------|---------|---------|---------|
| Slope (Arrhenius plot)             | -4.57   | -5.95   | -5.56   | -6.88   |
| $R^2$ (Arrhenius plot)             | 0.99    | 1.00    | 0.99    | 0.99    |
| $E_a$ (J/mol)                      | 38.01   | 49.45   | 46.25   | 57.24   |
| $R^2$ (Clausius-Clapeyron plot)    | 0.99    | 1.00    | 0.99    | 0.99    |
| $\Delta H_{\text{sub}}$ (kJ/mol)   | 39.82   | 51.28   | 48.14   | 59.17   |
| $T$ at 1 Torr ( $^\circ\text{C}$ ) | 109.98  | 111.39  | 101.32  | 116.69  |
| $T$ window ( $^\circ\text{C}$ )    | 121-203 | 129-207 | 140-224 | 151-231 |
| Residual mass (%)                  | 0.80    | 0.13    | 0.30    | 0.08    |

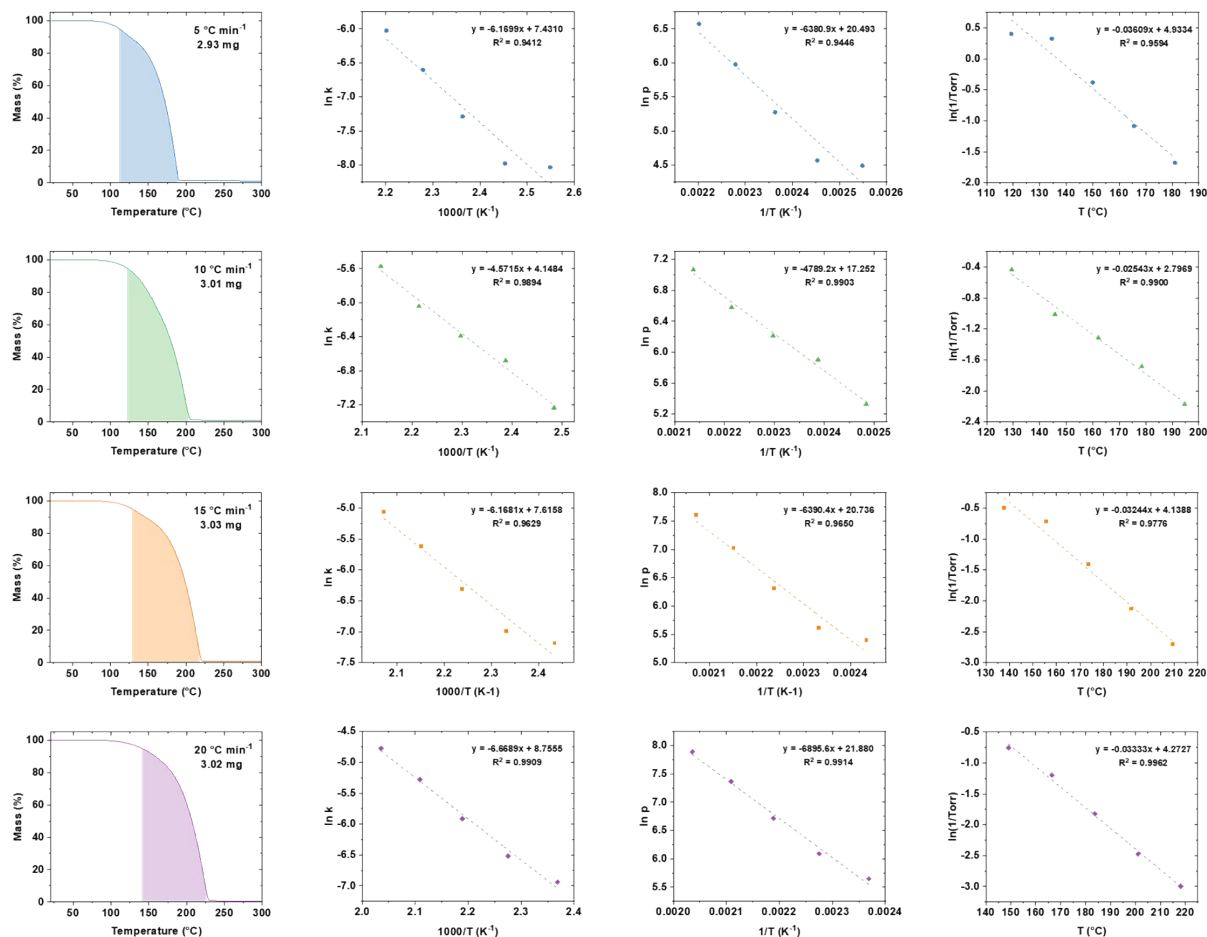

**Figure S15.** Thermogravimetric analysis of  $\text{WH}_2(\text{iPrCp})_2$ . TG traces at nominally 3 mg and variable temperature ramp rates of 5 (blue), 10 (green), 15 (orange), and 20 (purple)  $^\circ\text{C}/\text{min}$  (with actual masses displayed on graphs). Shaded regions underneath TG traces represent TGA temperature windows. Plots of  $\ln k$  vs  $1000/T$ ,  $\ln p$  vs  $1/T$ , and  $\ln(1/\text{Torr})$  vs  $T$  used to derive  $E_a$ ,  $\Delta H_{\text{sub}}$ , and  $T$  at 1 Torr, respectively. Equation of line of best fit and  $R^2$  value displayed on each of these plots.

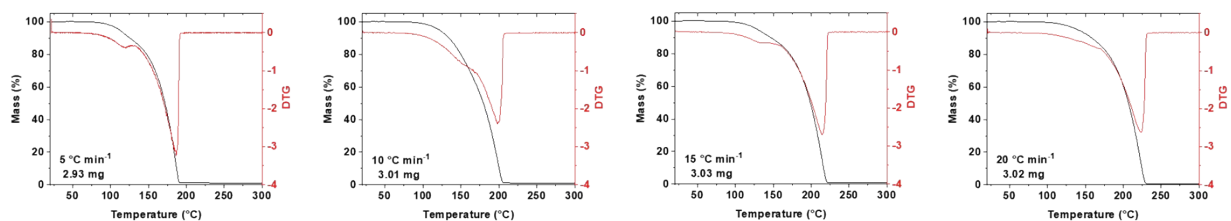

**Figure S16.** Thermogravimetric analysis of  $\text{WH}_2(\text{iPrCp})_2$ . TG traces at nominally 3 mg and variable temperature ramp rates with derivative thermogravimetric (DTG) traces shown.

**Table S8.** Measured and calculated thermophysical parameters from TGA of  $\text{WH}_2(\text{iPrCp})_2$  at nominally 3 mg and variable temperature ramp rates.

| Heating rate (°C/min)            | 5       | 10      | 15      | 20      |
|----------------------------------|---------|---------|---------|---------|
| Sample mass (mg)                 | 2.93    | 3.01    | 3.03    | 3.02    |
| Slope (Arrhenius plot)           | -6.17   | -4.57   | -6.17   | -6.67   |
| $R^2$ (Arrhenius plot)           | 0.94    | 0.99    | 0.96    | 0.99    |
| $E_a$ (J/mol)                    | 51.30   | 38.01   | 51.28   | 55.45   |
| $R^2$ (Clausius-Clapeyron plot)  | 0.94    | 0.99    | 0.97    | 0.99    |
| $\Delta H_{\text{sub}}$ (kJ/mol) | 53.05   | 39.82   | 53.13   | 57.33   |
| $T$ at 1 Torr (°C)               | 136.70  | 109.98  | 127.58  | 128.19  |
| $T$ window (°C)                  | 112-189 | 121-203 | 129-218 | 141-227 |
| Residual mass (%)                | 1.07    | 0.80    | 0.85    | 0.66    |

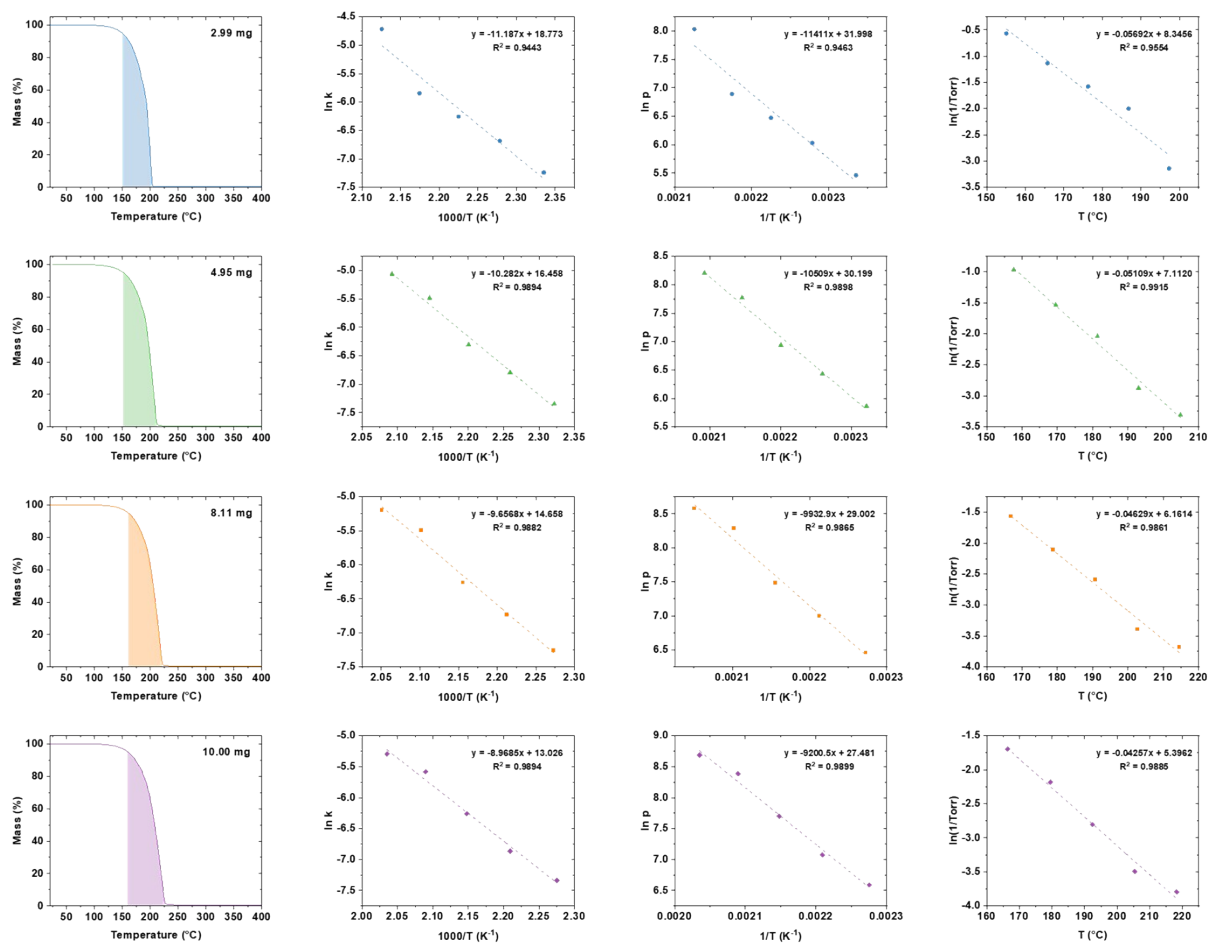

**Figure S17.** Thermogravimetric analysis of  $\text{WH}_2(\text{Cp})_2$ . TG traces at constant temperature ramp rate of  $10^\circ\text{C}/\text{min}$  and nominally 3 (blue), 5 (green), 8 (orange), and 10 (purple) mg (with actual masses displayed on graphs). Shaded regions underneath TG traces represent TGA temperature windows. Plots of  $\ln k$  vs  $1000/T$ ,  $\ln p$  vs  $1/T$ , and  $\ln(1/\text{Torr})$  vs  $T$  used to derive  $E_a$ ,  $\Delta H_{\text{sub}}$ , and  $T$  at 1 Torr, respectively. Equation of line of best fit and  $R^2$  value displayed on each of these plots.

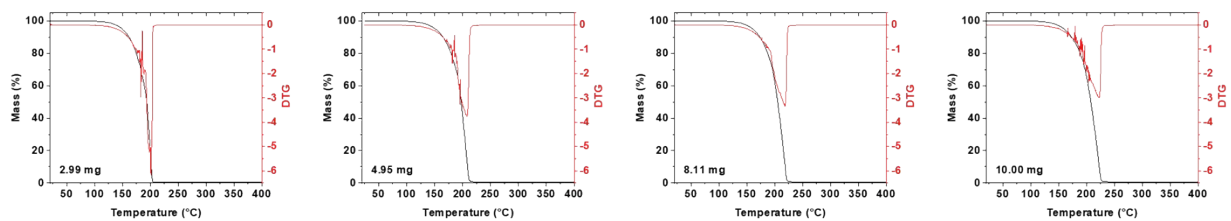

**Figure S18.** Thermogravimetric analysis of  $\text{WH}_2(\text{Cp})_2$ . TG traces at constant temperature ramp rate of  $10^\circ\text{C}/\text{min}$  and variable masses with derivative thermogravimetric (DTG) traces shown.

**Table S9.** Measured and calculated thermophysical parameters from TGA of  $\text{WH}_2(\text{Cp})_2$  at constant temperature ramp rate of  $10\text{ }^\circ\text{C}/\text{min}$  and variable masses.

| Sample mass (mg)                   | 2.99    | 4.95    | 8.11    | 10.00   |
|------------------------------------|---------|---------|---------|---------|
| Slope (Arrhenius plot)             | -11.19  | -10.28  | -9.66   | -8.97   |
| $R^2$ (Arrhenius plot)             | 0.94    | 0.99    | 0.99    | 0.99    |
| $E_a$ (J/mol)                      | 93.01   | 85.48   | 80.29   | 74.56   |
| $R^2$ (Clausius-Clapeyron plot)    | 0.95    | 0.99    | 0.99    | 0.99    |
| $\Delta H_{\text{sub}}$ (kJ/mol)   | 94.88   | 87.38   | 82.59   | 76.50   |
| $T$ at 1 Torr ( $^\circ\text{C}$ ) | 146.62  | 139.21  | 133.10  | 126.76  |
| $T$ window ( $^\circ\text{C}$ )    | 150-203 | 152-210 | 161-220 | 160-225 |
| Residual mass (%)                  | 0.58    | 0.49    | 0.59    | 0.57    |

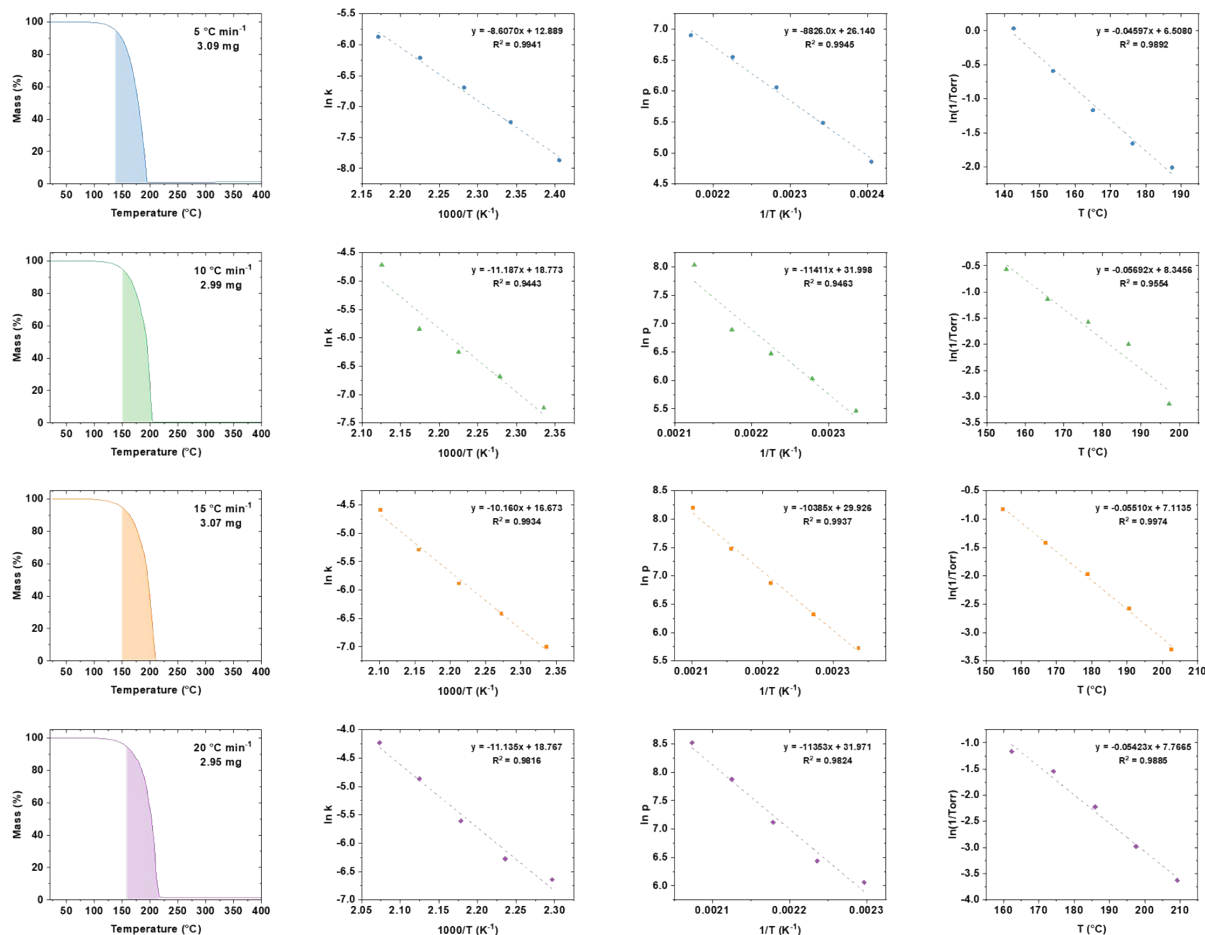

**Figure S19.** Thermogravimetric analysis of  $\text{WH}_2(\text{Cp})_2$ . TG traces at nominally 3 mg and variable temperature ramp rates of 5 (blue), 10 (green), 15 (orange), and 20 (purple)  $^\circ\text{C}/\text{min}$  (with actual masses displayed on graphs). Shaded regions underneath TG traces represent TGA temperature windows. Plots of  $\ln k$  vs  $1000/T$ ,  $\ln p$  vs  $1/T$ , and  $\ln(1/\text{Torr})$  vs  $T$  used to derive  $E_a$ ,  $\Delta H_{\text{sub}}$ , and  $T$  at 1 Torr, respectively. Equation of line of best fit and  $R^2$  value displayed on each of these plots.

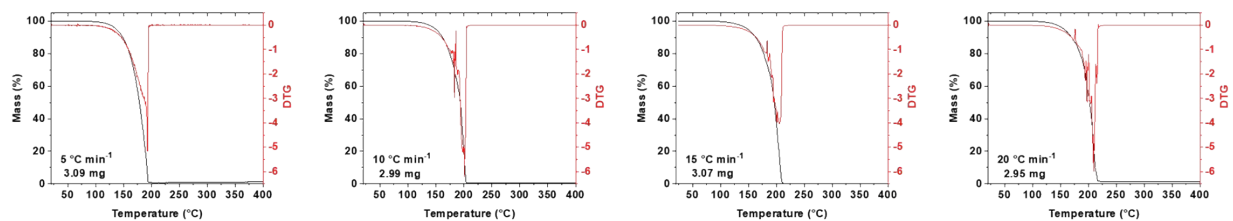

**Figure S20.** Thermogravimetric analysis of  $\text{WH}_2(\text{Cp})_2$ . TG traces at nominally 3 mg and variable temperature ramp rates with derivative thermogravimetric (DTG) traces shown.

**Table S10.** Measured and calculated thermophysical parameters from TGA of  $\text{WH}_2(\text{Cp})_2$  at nominally 3 mg and variable temperature ramp rates.

| Heating rate ( $^{\circ}\text{C}/\text{min}$ ) | 5       | 10      | 15      | 20      |
|------------------------------------------------|---------|---------|---------|---------|
| Sample mass (mg)                               | 3.09    | 2.99    | 3.07    | 2.95    |
| Slope (Arrhenius plot)                         | -8.61   | -11.19  | -10.16  | -11.14  |
| $R^2$ (Arrhenius plot)                         | 0.99    | 0.94    | 0.99    | 0.98    |
| $E_a$ (J/mol)                                  | 71.56   | 93.01   | 84.47   | 92.58   |
| $R^2$ (Clausius-Clapeyron plot)                | 0.99    | 0.95    | 0.99    | 0.98    |
| $\Delta H_{\text{sub}}$ (kJ/mol)               | 73.38   | 94.88   | 86.35   | 94.39   |
| $T$ at 1 Torr ( $^{\circ}\text{C}$ )           | 141.57  | 146.62  | 129.10  | 143.21  |
| $T$ window ( $^{\circ}\text{C}$ )              | 137-193 | 150-203 | 149-208 | 157-215 |
| Residual mass (%)                              | 1.25    | 0.58    | 0.00    | 1.43    |



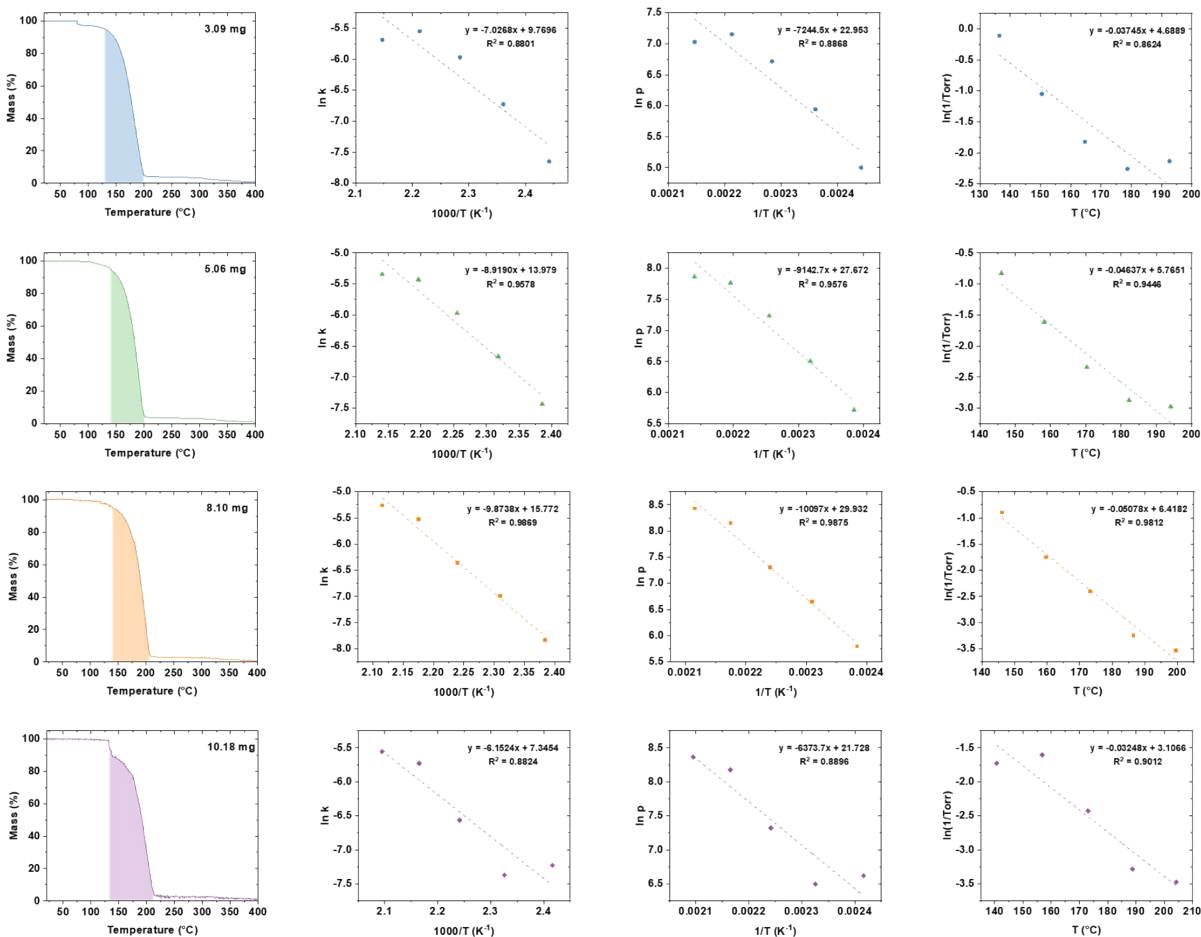

**Figure S21.** Thermogravimetric analysis of  $[\text{WCl}_5]_2$ . TG traces at constant temperature ramp rate of  $10^\circ\text{C}/\text{min}$  and nominally 3 (blue), 5 (green), 8 (orange), and 10 (purple) mg (with actual masses displayed on graphs). Shaded regions underneath TG traces represent TGA temperature windows. Plots of  $\ln k$  vs  $1000/T$ ,  $\ln p$  vs  $1/T$ , and  $\ln(1/\text{Torr})$  vs  $T$  used to derive  $E_a$ ,  $\Delta H_{\text{sub}}$ , and  $T$  at 1 Torr, respectively. Equation of line of best fit and  $R^2$  value displayed on each of these plots.

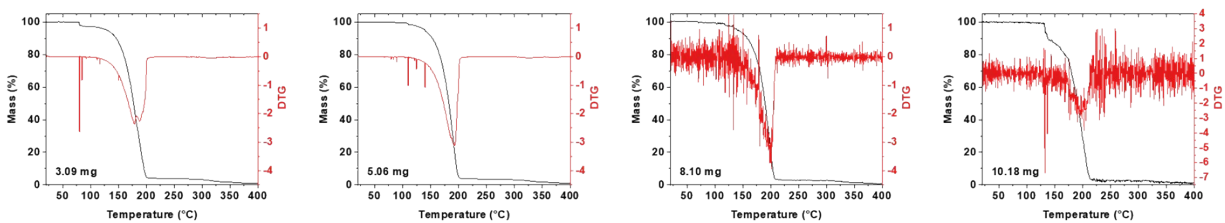

**Figure S22.** Thermogravimetric analysis of  $[\text{WCl}_5]_2$ . TG traces at constant temperature ramp rate of  $10^\circ\text{C}/\text{min}$  and variable masses with derivative thermogravimetric (DTG) traces shown.

**Table S11.** Measured and calculated thermophysical parameters from TGA of  $[\text{WCl}_5]_2$  at constant temperature ramp rate of  $10\text{ }^\circ\text{C}/\text{min}$  and variable masses.

| Sample mass (mg)                   | 3.09    | 5.06    | 8.10    | 10.18   |
|------------------------------------|---------|---------|---------|---------|
| Slope (Arrhenius plot)             | -7.03   | -8.92   | -9.87   | -6.15   |
| $R^2$ (Arrhenius plot)             | 0.88    | 0.96    | 0.99    | 0.88    |
| $E_a$ (J/mol)                      | 58.42   | 74.15   | 82.09   | 51.15   |
| $R^2$ (Clausius-Clapeyron plot)    | 0.89    | 0.96    | 0.99    | 0.89    |
| $\Delta H_{\text{sub}}$ (kJ/mol)   | 60.23   | 76.02   | 83.95   | 52.99   |
| $T$ at 1 Torr ( $^\circ\text{C}$ ) | 125.20  | 124.33  | 126.39  | 95.65   |
| $T$ window ( $^\circ\text{C}$ )    | 130-200 | 140-200 | 140-206 | 133-212 |
| Residual mass (%)                  | 0.81    | 1.03    | 0.71    | 1.29    |

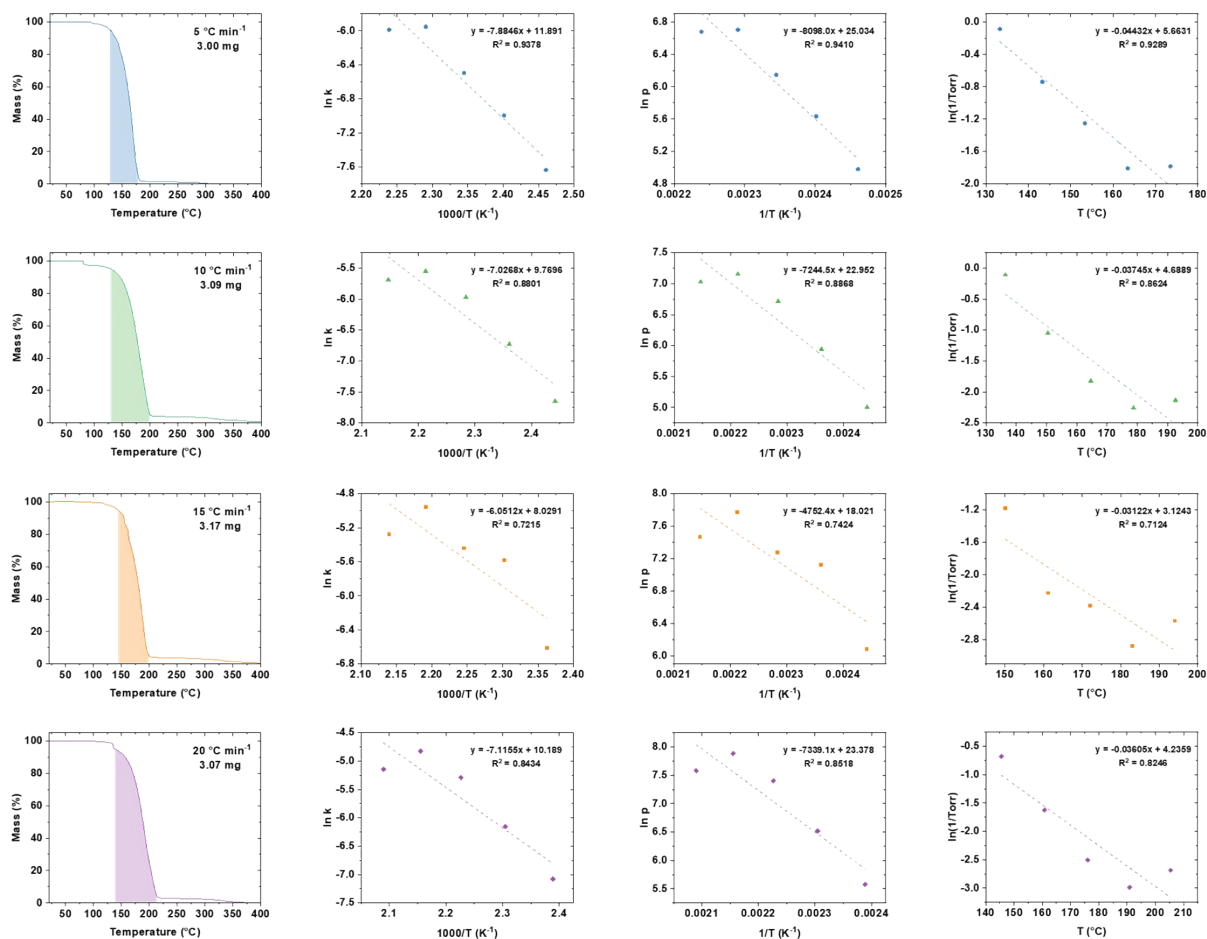

**Figure S23.** Thermogravimetric analysis of  $[\text{WCl}_5]_2$ . TG traces at nominally 3 mg and variable temperature ramp rates of 5 (blue), 10 (green), 15 (orange), and 20 (purple)  $^\circ\text{C}/\text{min}$  (with actual masses displayed on graphs). Shaded regions underneath TG traces represent TGA temperature windows. Plots of  $\ln k$  vs  $1000/T$ ,  $\ln p$  vs  $1/T$ , and  $\ln(1/\text{Torr})$  vs  $T$  used to derive  $E_a$ ,  $\Delta H_{\text{sub}}$ , and  $T$  at 1 Torr, respectively. Equation of line of best fit and  $R^2$  value displayed on each of these plots.

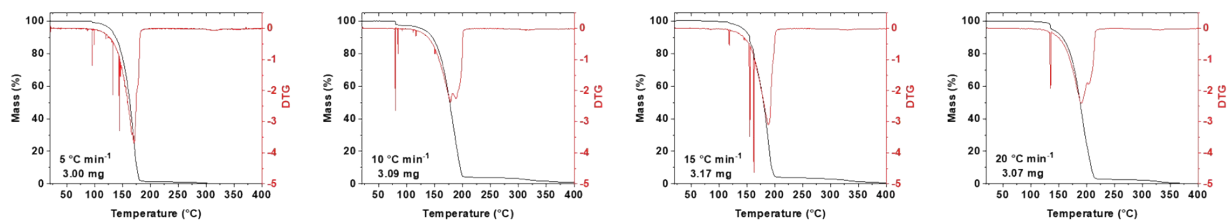

**Figure S24.** Thermogravimetric analysis of  $[\text{WCl}_5]_2$ . TG traces at nominally 3 mg and variable temperature ramp rates with derivative thermogravimetric (DTG) traces shown.

**Table S12.** Measured and calculated thermophysical parameters from TGA of  $[\text{WCl}_5]_2$  at nominally 3 mg and variable temperature ramp rates.

| Heating rate ( $^{\circ}\text{C}/\text{min}$ ) | 5       | 10      | 15      | 20      |
|------------------------------------------------|---------|---------|---------|---------|
| Sample mass (mg)                               | 3.00    | 3.09    | 3.17    | 3.07    |
| Slope (Arrhenius plot)                         | -7.88   | -7.03   | -6.05   | -7.12   |
| $R^2$ (Arrhenius plot)                         | 0.94    | 0.88    | 0.72    | 0.84    |
| $E_a$ (J/mol)                                  | 65.55   | 58.42   | 50.31   | 59.16   |
| $R^2$ (Clausius-Clapeyron plot)                | 0.94    | 0.89    | 0.74    | 0.85    |
| $\Delta H_{\text{sub}}$ (kJ/mol)               | 67.33   | 60.23   | 39.51   | 61.02   |
| $T$ at 1 Torr ( $^{\circ}\text{C}$ )           | 127.78  | 125.20  | 100.07  | 117.50  |
| $T$ window ( $^{\circ}\text{C}$ )              | 128-178 | 130-200 | 145-199 | 138-213 |
| Residual mass (%)                              | 0.00    | 0.81    | 0.67    | 0.00    |

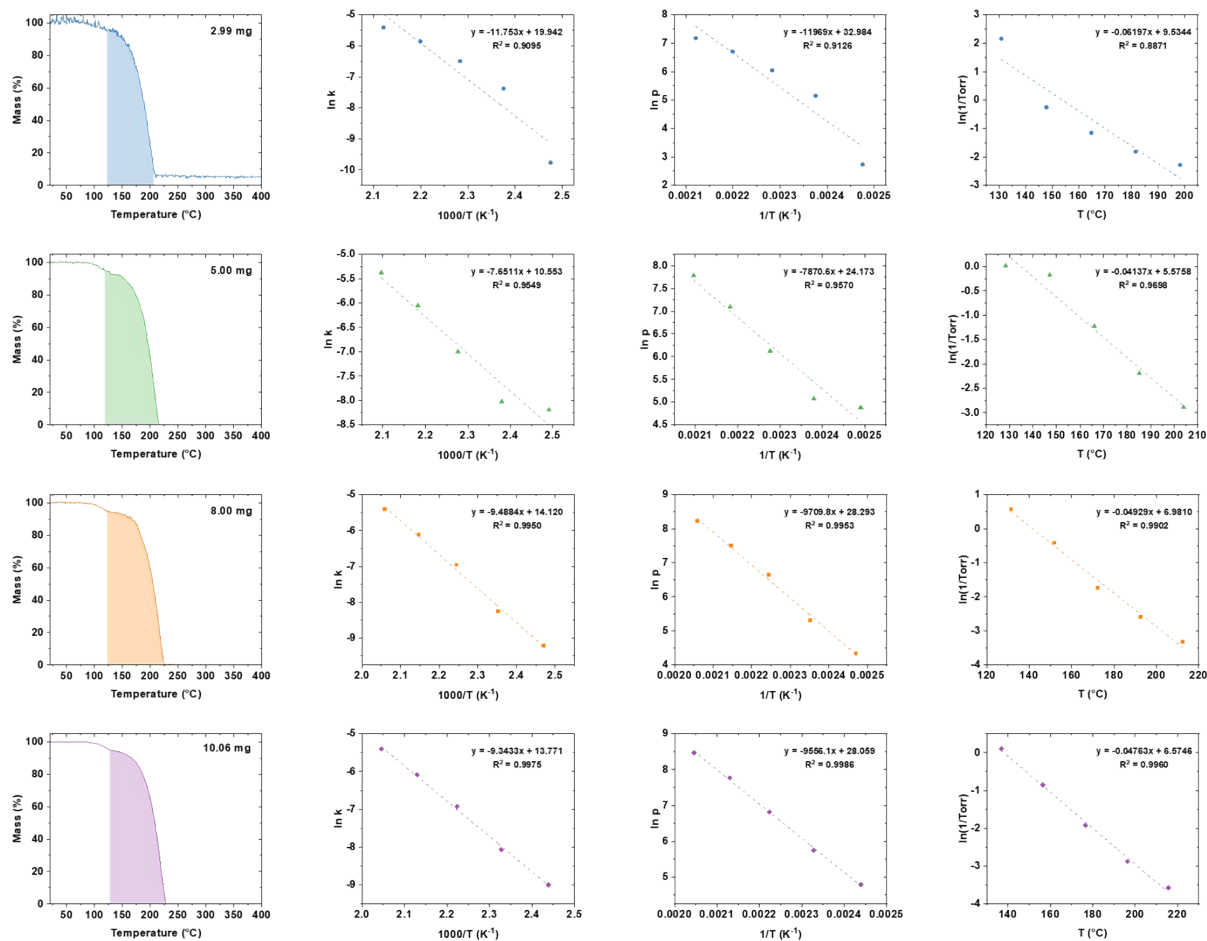

**Figure S25.** Thermogravimetric analysis of  $WCl_6$ . TG traces at constant temperature ramp rate of  $10\text{ }^\circ\text{C}/\text{min}$  and nominally 3 (blue), 5 (green), 8 (orange), and 10 (purple) mg (with actual masses displayed on graphs). Shaded regions underneath TG traces represent TGA temperature windows. Plots of  $\ln k$  vs  $1000/T$ ,  $\ln p$  vs  $1/T$ , and  $\ln(1/\text{Torr})$  vs  $T$  used to derive  $E_a$ ,  $\Delta H_{\text{sub}}$ , and  $T$  at 1 Torr, respectively. Equation of line of best fit and  $R^2$  value displayed on each of these plots.

**Figure S26.** Thermogravimetric analysis of  $WCl_6$ . TG traces at constant temperature ramp rate of  $10\text{ }^\circ\text{C}/\text{min}$  and variable masses with derivative thermogravimetric (DTG) traces shown.

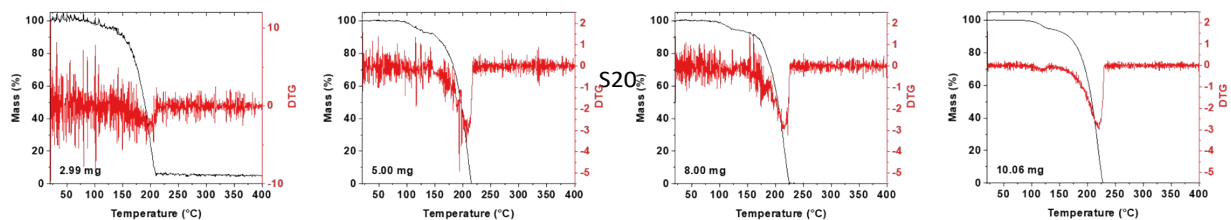

**Table S13.** Measured and calculated thermophysical parameters from TGA of  $\text{WCl}_6$  at constant temperature ramp rate of  $10\text{ }^\circ\text{C}/\text{min}$  and variable masses.

| Sample mass (mg)                   | 2.99    | 5.00    | 8.00    | 10.06   |
|------------------------------------|---------|---------|---------|---------|
| Slope (Arrhenius plot)             | -11.75  | -7.65   | -9.49   | -9.34   |
| $R^2$ (Arrhenius plot)             | 0.91    | 0.95    | 1.00    | 1.00    |
| $E_a$ (J/mol)                      | 97.71   | 63.61   | 78.89   | 77.68   |
| $R^2$ (Clausius-Clapeyron plot)    | 0.91    | 0.96    | 1.00    | 1.00    |
| $\Delta H_{\text{sub}}$ (kJ/mol)   | 99.52   | 65.44   | 80.73   | 79.45   |
| $T$ at 1 Torr ( $^\circ\text{C}$ ) | 153.86  | 134.78  | 141.63  | 138.03  |
| $T$ window ( $^\circ\text{C}$ )    | 122-207 | 119-213 | 122-222 | 127-225 |
| Residual mass (%)                  | 5.00    | 0.00    | 0.00    | 0.00    |

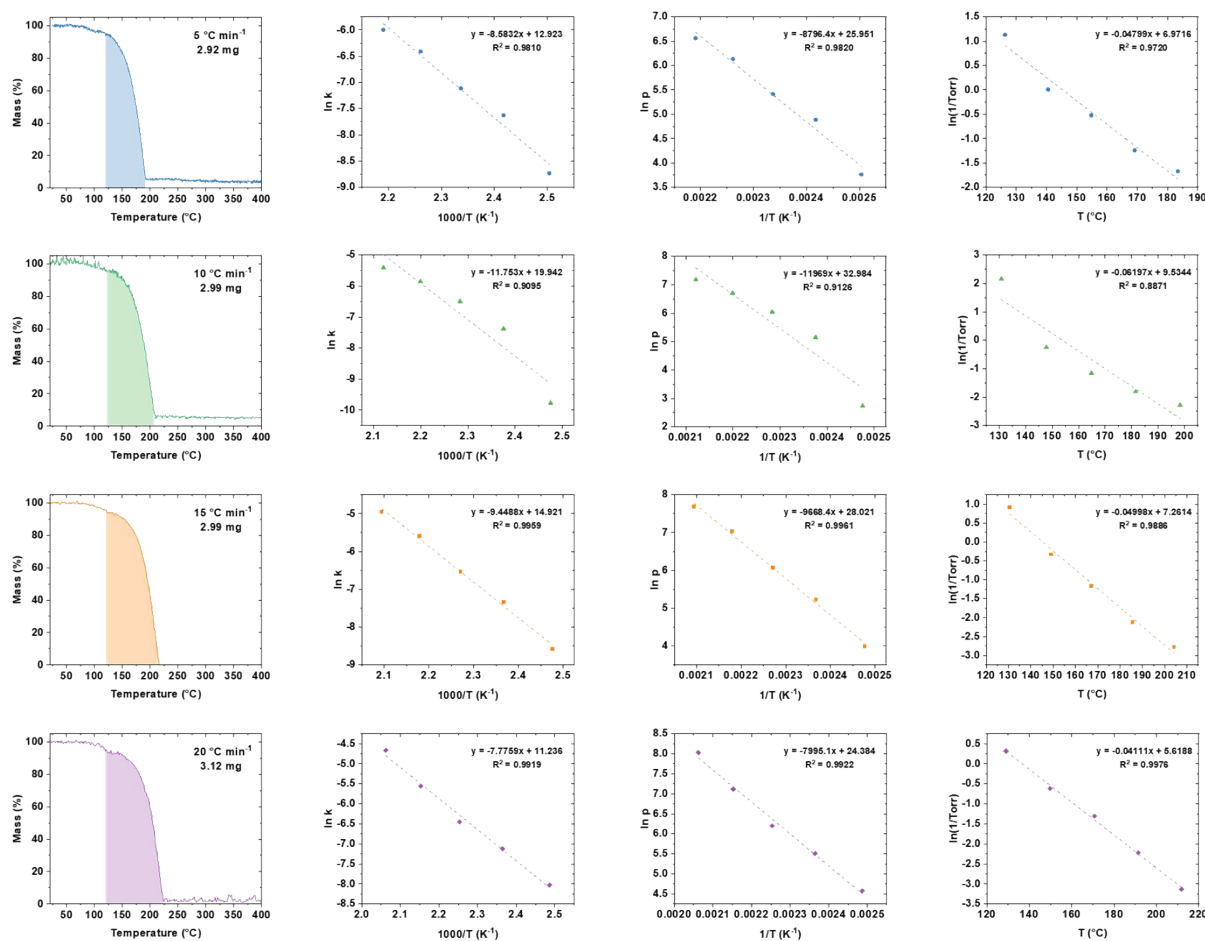

**Figure S27.** Thermogravimetric analysis of  $\text{WCl}_6$ . TG traces at nominally 3 mg and variable temperature ramp rates of 5 (blue), 10 (green), 15 (orange), and 20 (purple)  $^\circ\text{C}/\text{min}$  (with actual masses displayed on graphs). Shaded regions underneath TG traces represent TGA temperature windows. Plots of  $\ln k$  vs  $1000/T$ ,  $\ln p$  vs  $1/T$ , and  $\ln(1/\text{Torr})$  vs  $T$  used to derive  $E_a$ ,  $\Delta H_{\text{sub}}$ , and  $T$  at 1 Torr, respectively. Equation of line of best fit and  $R^2$  value displayed on each of these plots.

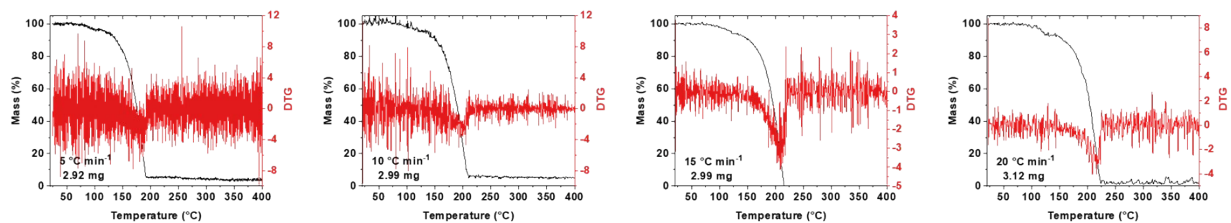

**Figure S28.** Thermogravimetric analysis of  $WCl_6$ . TG traces at nominally 3 mg and variable temperature ramp rates with derivative thermogravimetric (DTG) traces shown.

**Table S14.** Measured and calculated thermophysical parameters from TGA of  $WCl_6$  at nominally 3 mg and variable temperature ramp rates.

| Heating rate ( $^{\circ}C/min$ ) | 5       | 10      | 15      | 20      |
|----------------------------------|---------|---------|---------|---------|
| Sample mass (mg)                 | 2.92    | 2.99    | 2.99    | 3.12    |
| Slope (Arrhenius plot)           | -8.59   | -11.75  | -9.45   | -7.78   |
| $R^2$ (Arrhenius plot)           | 0.98    | 0.91    | 1.00    | 0.99    |
| $E_a$ (J/mol)                    | 71.44   | 97.71   | 78.56   | 64.65   |
| $R^2$ (Clausius-Clapeyron plot)  | 0.98    | 0.91    | 1.00    | 0.99    |
| $\Delta H_{sub}$ (kJ/mol)        | 73.14   | 99.52   | 80.39   | 66.48   |
| $T$ at 1 Torr ( $^{\circ}C$ )    | 145.27  | 153.86  | 145.29  | 136.68  |
| $T$ window ( $^{\circ}C$ )       | 119-190 | 122-207 | 121-214 | 119-222 |
| Residual mass (%)                | 3.52    | 5.00    | 0.00    | 1.16    |

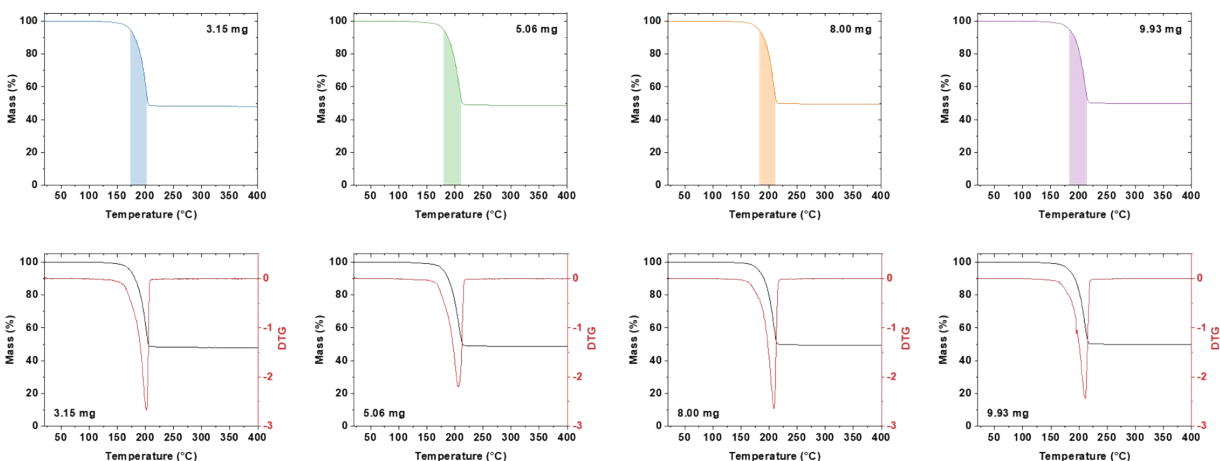

**Figure S29.** Thermogravimetric analysis of (mes)W(CO)<sub>3</sub>. TG traces at constant temperature ramp rate of 10 °C/min and nominally 3 (blue), 5 (green), 8 (orange), and 10 (purple) mg (with actual masses displayed on graphs). Shaded regions underneath TG traces represent TGA temperature windows. Derivative thermogravimetric (DTG) traces also shown. Note (mes)W(CO)<sub>3</sub> led predominantly to decomposition products with 48.9 ± 0.8 % average residual mass precluding extraction of sublimation kinetics.

**Table S15.** Measured and calculated thermophysical parameters from TGA of (mes)W(CO)<sub>3</sub> at constant temperature ramp rate of 10 °C/min and variable masses.

| Sample mass (mg)  | 3.15    | 5.06    | 8.00    | 9.93    |
|-------------------|---------|---------|---------|---------|
| T window (°C)     | 173-203 | 180-211 | 182-211 | 183-214 |
| Residual mass (%) | 48.00   | 48.57   | 49.43   | 49.77   |

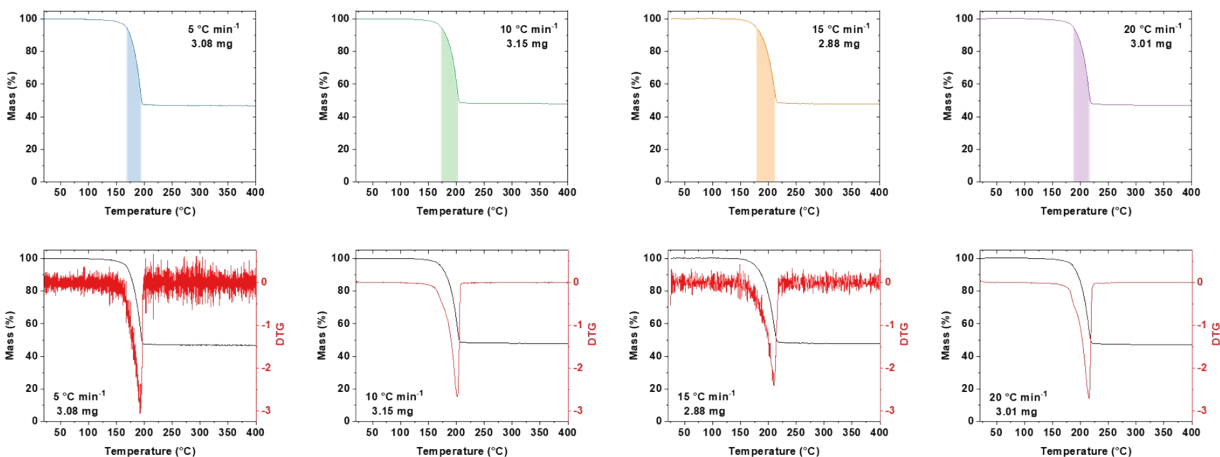

**Figure S30.** Thermogravimetric analysis of (mes)W(CO)<sub>3</sub>. TG traces at nominally 3 mg and variable temperature ramp rates of 5 (blue), 10 (green), 15 (orange), and 20 (purple) °C/min (with actual masses displayed on graphs). Shaded regions underneath TG traces represent TGA temperature windows. Derivative thermogravimetric (DTG) traces also shown. Note (mes)W(CO)<sub>3</sub> led predominantly to decomposition products with 47.5 ± 0.6 % average residual mass precluding extraction of sublimation kinetics.

**Table S16.** Measured and calculated thermophysical parameters from TGA of (mes)W(CO)<sub>3</sub> at nominally 3 mg and variable temperature ramp rates.

| Heating rate (°C/min) | 5       | 10      | 15      | 20      |
|-----------------------|---------|---------|---------|---------|
| Sample mass (mg)      | 3.08    | 3.15    | 2.88    | 3.01    |
| T window (°C)         | 168-195 | 173-203 | 178-213 | 188-217 |
| Residual mass (%)     | 46.82   | 48.00   | 47.87   | 47.16   |

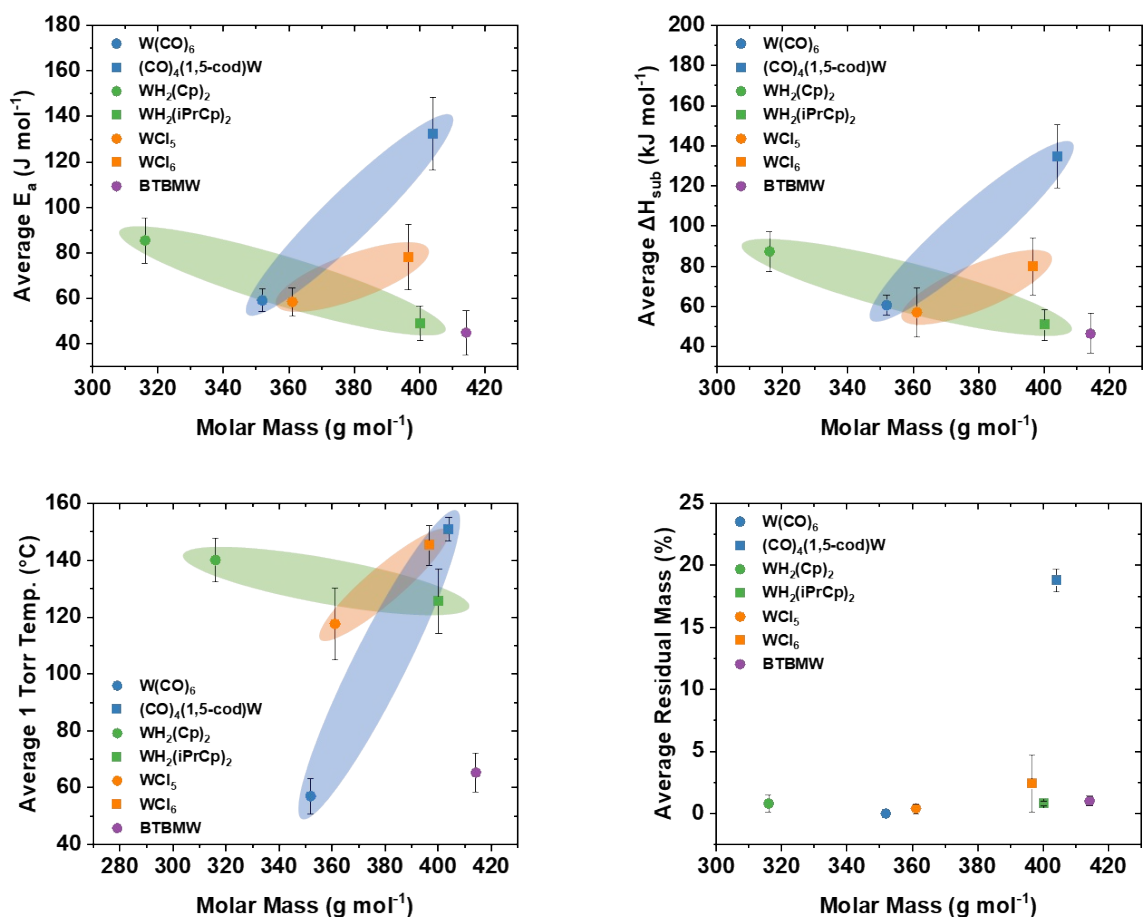

**Figure S31.** Plots comparing TGA-derived  $E_a$ ,  $\Delta H_{\text{sub}}$ ,  $T$  at 1 Torr, and residual mass, respectively, of  $\text{W}(\text{CO})_6$ ,  $(1,5\text{-cod})\text{W}(\text{CO})_4$ ,  $\text{WH}_2\text{Cp}_2$ ,  $\text{WH}_2(\text{iPrCp})_2$ ,  $\text{WCl}_6$ ,  $[\text{WCl}_5]_2$ , and BTBMW plotted against their molar masses. Thermophysical parameters are averages with error bars representing standard deviations, and based on TGA experiments in which sample loading was fixed at nominally 3 mg and temperature ramp rates were varied between 5, 10, 15, and 20 °C/min. The shaded regions group precursors together based on their ligand environments: carbonyl ligands (blue), cyclopentadienyl ligands (green), chloride ligands (orange), and amido/imido ligands (purple). Both  $\text{WH}_2(\text{iPrCp})_2$  and BTBMW are liquids at RT; the rest of the precursors shown are solids. Note (mes) $\text{W}(\text{CO})_3$  led predominantly to decomposition products with  $47.5 \pm 0.6\%$  average residual mass precluding extraction of sublimation kinetics.

**Table S17.** TGA-derived  $E_a$ ,  $\Delta H_{\text{sub}}$  and 1 Torr temperature values from trials varying temperature ramp rate, with fixed 3 mg sample loading.<sup>a</sup>

| Molecule                                | $E_a$ (J/mol)    | $\Delta H_{\text{sub}}$ (kJ/mol) | $T$ at 1 Torr (°C) | Res. Mass (%)  |
|-----------------------------------------|------------------|----------------------------------|--------------------|----------------|
| $\text{W}(\text{CO})_6$                 | $59.1 \pm 4.9$   | $60.6 \pm 4.9$                   | $57.0 \pm 6.3$     | $0.0 \pm 0.0$  |
| $(1,5\text{-cod})\text{W}(\text{CO})_4$ | $132.4 \pm 15.9$ | $134.6 \pm 15.8$                 | $150.9 \pm 4.1$    | $18.8 \pm 0.9$ |
| $\text{WH}_2\text{Cp}_2$                | $85.4 \pm 10.0$  | $87.3 \pm 10.0$                  | $140.1 \pm 7.7$    | $0.8 \pm 0.7$  |
| $\text{WH}_2(\text{iPrCp})_2$           | $49.0 \pm 7.6$   | $50.8 \pm 7.6$                   | $125.6 \pm 11.2$   | $0.8 \pm 0.2$  |
| BTBMW                                   | $44.9 \pm 9.8$   | $46.4 \pm 9.9$                   | $65.3 \pm 6.8$     | $1.0 \pm 0.4$  |
| $\text{WCl}_6$                          | $78.1 \pm 14.3$  | $79.9 \pm 14.3$                  | $145.3 \pm 7.0$    | $2.4 \pm 2.3$  |
| $[\text{WCl}_5]_2$                      | $58.4 \pm 6.2$   | $57.0 \pm 12.1$                  | $117.6 \pm 12.5$   | $0.4 \pm 0.4$  |

<sup>a</sup> Note (mes) $\text{W}(\text{CO})_3$  led predominantly to decomposition products with  $47.5 \pm 0.6\%$  average residual mass precluding extraction of sublimation kinetics.
